# Supplementary material for: The Absence of Pyruvate Kinase Affects Glucose-Dependent Carbon Catabolite Repression in Bacillus subtilis
Source: MDPI journal article supplement (doi:10.3390/metabo9100216), 2019-10-04
Supplement: s1 [file s1]

| Metabolite                     | M9GlcPyr |        |        |        |              |                     |         |
|--------------------------------|----------|--------|--------|--------|--------------|---------------------|---------|
|                                | wt       |        | Δpyk   |        | FC (Δpyk/wt) | log <sub>2</sub> FC | p-value |
|                                | Mean     | SD     | Mean   | SD     |              |                     |         |
| 2-oxoglutarate                 | 0.068    | 0.017  | 0.069  | 0.040  | 1.024        | 0.035               | 0.942   |
| 2-phosphoglycerate             | 0.035    | 0.020  | 0.111  | 0.062  | 3.185        | 1.671               | 0.057   |
| 3-hydroxybutyrate              | 0.005    | 0.002  | 0.007  | 0.002  | 1.275        | 0.350               | 0.303   |
| 3-phosphoglycerate             | 0.986    | 0.241  | 3.028  | 1.631  | 3.072        | 1.619               | 0.048   |
| 4-hydroxy-L-proline            | 0.006    | 0.005  | 0.017  | 0.031  | 2.984        | 1.577               | 0.502   |
| 5-methyluridine                | 0.006    | 0.002  | 0.003  | 0.002  | 0.466        | -1.103              | 0.058   |
| 5-oxo-proline                  | 9.124    | 3.452  | 5.880  | 2.945  | 0.644        | -0.634              | 0.203   |
| Acetyl adenylate               | 0.143    | 0.048  | 0.301  | 0.148  | 2.108        | 1.076               | 0.089   |
| Acetyl-CoA                     | 0.017    | 0.015  | 0.024  | 0.020  | 1.470        | 0.556               | 0.552   |
| Adenylsuccinate                | 0.008    | 0.004  | 0.014  | 0.009  | 1.832        | 0.873               | 0.261   |
| ADP                            | 2.379    | 0.390  | 2.387  | 0.850  | 1.004        | 0.005               | 0.986   |
| Alanine                        | 1.393    | 0.359  | 0.982  | 0.569  | 0.705        | -0.505              | 0.267   |
| AMP                            | 0.356    | 0.065  | 0.763  | 0.175  | 2.144        | 1.100               | 0.005   |
| Arginine                       | 0.548    | 0.997  | 0.051  | 0.010  | 0.093        | -3.422              | 0.357   |
| Asparagine                     | 0.041    | 0.034  | 0.048  | 0.046  | 1.161        | 0.216               | 0.826   |
| Aspartate                      | 2.527    | 1.213  | 2.250  | 1.298  | 0.890        | -0.168              | 0.765   |
| ATP                            | 5.630    | 0.965  | 3.252  | 1.347  | 0.578        | -0.792              | 0.028   |
| CDP                            | 0.066    | 0.011  | 0.079  | 0.034  | 1.196        | 0.258               | 0.493   |
| CDP-glycerol                   | 0.258    | 0.080  | 0.196  | 0.106  | 0.760        | -0.396              | 0.387   |
| Citrate                        | 1.710    | 0.143  | 1.621  | 0.278  | 0.948        | -0.077              | 0.589   |
| Citrulline                     | 0.641    | 0.392  | 0.940  | 0.472  | 1.466        | 0.552               | 0.367   |
| CMP                            | 0.005    | 0.002  | 0.006  | 0.002  | 1.242        | 0.313               | 0.434   |
| CTP                            | 0.128    | 0.043  | 0.048  | 0.022  | 0.375        | -1.415              | 0.016   |
| Cysteine                       | 0.001    | 0.001  | 0.002  | 0.001  | 1.784        | 0.835               | 0.240   |
| Cytidine                       | 0.002    | 0.001  | 0.002  | 0.002  | 1.002        | 0.002               | 0.998   |
| dAMP                           | 0.007    | 0.004  | 0.008  | 0.001  | 1.066        | 0.092               | 0.826   |
| dATP                           | 0.069    | 0.024  | 0.035  | 0.022  | 0.509        | -0.974              | 0.083   |
| dCDP                           | 0.019    | 0.002  | 0.013  | 0.005  | 0.713        | -0.488              | 0.095   |
| dCTP                           | 0.095    | 0.029  | 0.026  | 0.013  | 0.268        | -1.900              | 0.004   |
| Deoxycytidine                  | 0.006    | 0.004  | 0.007  | 0.006  | 1.209        | 0.273               | 0.726   |
| Dihydroxyacetone phosphate     | 0.025    | 0.010  | 0.057  | 0.028  | 2.299        | 1.201               | 0.075   |
| dTDP                           | 0.058    | 0.006  | 0.043  | 0.016  | 0.750        | -0.416              | 0.145   |
| dTMP                           | 0.023    | 0.006  | 0.011  | 0.004  | 0.469        | -1.094              | 0.015   |
| dUMP                           | 0.006    | 0.002  | 0.009  | 0.002  | 1.421        | 0.507               | 0.092   |
| Erythrose 4-phosphate          | 0.001    | 0.000  | 0.002  | 0.001  | 1.883        | 0.913               | 0.135   |
| FAD                            | 0.002    | 0.001  | 0.003  | 0.001  | 1.264        | 0.338               | 0.185   |
| Fructose 1,6bis-phosphate      | 0.254    | 0.158  | 0.469  | 0.263  | 1.846        | 0.885               | 0.211   |
| Fructose 6-phosphate           | 0.067    | 0.018  | 0.304  | 0.159  | 4.571        | 2.192               | 0.025   |
| Fumarate                       | 0.423    | 0.224  | 0.610  | 0.433  | 1.443        | 0.529               | 0.472   |
| GDP                            | 0.175    | 0.020  | 0.252  | 0.057  | 1.441        | 0.527               | 0.044   |
| Gluconate 6-phosphate          | 0.018    | 0.007  | 0.025  | 0.009  | 1.427        | 0.513               | 0.233   |
| Glucono 1,5lactone 6-phosphate | 0.005    | 0.002  | 0.004  | 0.002  | 0.650        | -0.621              | 0.236   |
| Glucose 6-phosphate            | 0.132    | 0.047  | 0.660  | 0.330  | 5.017        | 2.327               | 0.019   |
| Glutamate                      | 92.072   | 25.467 | 57.827 | 30.004 | 0.628        | -0.671              | 0.132   |
| Glutamine                      | 1.878    | 1.024  | 1.205  | 0.779  | 0.641        | -0.641              | 0.335   |
| Glycerate                      | 0.011    | 0.002  | 0.018  | 0.003  | 1.655        | 0.727               | 0.014   |
| Glycine                        | 0.408    | 0.266  | 0.227  | 0.140  | 0.556        | -0.846              | 0.273   |

| Metabolite                    | M9GlcPyr |        |        |        |              |                     |         |
|-------------------------------|----------|--------|--------|--------|--------------|---------------------|---------|
|                               | wt       |        | Δpyk   |        | FC (Δpyk/wt) | log <sub>2</sub> FC | p-value |
|                               | Mean     | SD     | Mean   | SD     |              |                     |         |
| GMP                           | 0.022    | 0.003  | 0.040  | 0.012  | 1.833        | 0.874               | 0.026   |
| GTP                           | 0.739    | 0.202  | 0.482  | 0.231  | 0.652        | -0.617              | 0.144   |
| Histidine                     | 0.021    | 0.004  | 0.018  | 0.005  | 0.876        | -0.192              | 0.427   |
| IMP                           | 0.218    | 0.032  | 0.086  | 0.033  | 0.395        | -1.341              | 0.001   |
| Isocitrate                    | 0.007    | 0.006  | 0.005  | 0.005  | 0.799        | -0.324              | 0.753   |
| Isoleucine                    | 0.324    | 0.204  | 0.134  | 0.070  | 0.412        | -1.280              | 0.127   |
| ITP                           | 0.467    | 0.093  | 0.266  | 0.112  | 0.571        | -0.810              | 0.034   |
| Lactate                       | 0.309    | 0.173  | 0.233  | 0.057  | 0.754        | -0.407              | 0.436   |
| Leucine                       | 1.216    | 0.336  | 0.731  | 0.379  | 0.601        | -0.734              | 0.104   |
| Lysine                        | 0.093    | 0.071  | 0.036  | 0.026  | 0.390        | -1.357              | 0.186   |
| Malate                        | 0.016    | 0.002  | 0.045  | 0.057  | 2.721        | 1.444               | 0.361   |
| Malonyl-CoA                   | 0.004    | 0.005  | 0.002  | 0.001  | 0.448        | -1.157              | 0.389   |
| Methionine                    | 0.091    | 0.031  | 0.054  | 0.026  | 0.591        | -0.758              | 0.112   |
| myo-inositol                  | 0.029    | 0.024  | 0.014  | 0.018  | 0.496        | -1.011              | 0.368   |
| Ornithine                     | 0.127    | 0.099  | 0.144  | 0.110  | 1.138        | 0.187               | 0.821   |
| Phenylalanine                 | 0.081    | 0.045  | 0.059  | 0.028  | 0.730        | -0.455              | 0.447   |
| Phenylpyruvate                | 0.007    | 0.002  | 0.006  | 0.002  | 0.901        | -0.150              | 0.653   |
| Phosphoenolpyruvate           | 0.054    | 0.010  | 0.544  | 0.350  | 10.035       | 3.327               | 0.031   |
| Proline                       | 0.052    | 0.053  | 0.035  | 0.021  | 0.679        | -0.558              | 0.578   |
| PRPP                          | 0.062    | 0.016  | 0.051  | 0.019  | 0.820        | -0.287              | 0.416   |
| Ribose/Ribulose-phosphate     | 0.031    | 0.007  | 0.037  | 0.009  | 1.184        | 0.243               | 0.346   |
| SAICAR                        | 0.027    | 0.012  | 0.025  | 0.014  | 0.916        | -0.126              | 0.812   |
| Sedoheptulose 7-phosphate     | 0.021    | 0.006  | 0.068  | 0.029  | 3.210        | 1.683               | 0.020   |
| Serine                        | 0.322    | 0.250  | 0.462  | 0.438  | 1.433        | 0.519               | 0.600   |
| Shikimate 3-phosphate         | 0.033    | 0.012  | 0.005  | 0.002  | 0.166        | -2.593              | 0.004   |
| Succinate                     | 0.205    | 0.004  | 0.172  | 0.086  | 0.836        | -0.259              | 0.465   |
| Threonine                     | 0.979    | 0.629  | 0.285  | 0.213  | 0.291        | -1.781              | 0.082   |
| Tryptophan                    | 0.173    | 0.062  | 0.130  | 0.073  | 0.751        | -0.412              | 0.406   |
| Tyrosine                      | 0.187    | 0.031  | 0.130  | 0.088  | 0.694        | -0.527              | 0.266   |
| UDP                           | 0.280    | 0.024  | 0.337  | 0.137  | 1.202        | 0.266               | 0.445   |
| UDP-GlcNAc                    | 1.009    | 0.282  | 0.885  | 0.480  | 0.877        | -0.189              | 0.672   |
| UDP-GlcNAcenolpyruvate        | 0.007    | 0.001  | 0.009  | 0.001  | 1.306        | 0.385               | 0.036   |
| UDP-Glucose                   | 0.510    | 0.083  | 0.512  | 0.243  | 1.005        | 0.007               | 0.986   |
| UDP-Glucuronate               | 0.188    | 0.051  | 0.412  | 0.224  | 2.185        | 1.128               | 0.100   |
| UDP-MurNAc                    | 0.063    | 0.007  | 0.086  | 0.032  | 1.373        | 0.457               | 0.207   |
| UDP-MurNAc-ala                | 0.005    | 0.003  | 0.007  | 0.004  | 1.340        | 0.423               | 0.451   |
| UDP-MurNAc-ala-glu            | 0.009    | 0.001  | 0.011  | 0.004  | 1.341        | 0.424               | 0.212   |
| UDP-MurNAc-ala-glu-pm-ala-ala | 0.232    | 0.067  | 0.209  | 0.067  | 0.898        | -0.155              | 0.637   |
| UMP                           | 0.047    | 0.005  | 0.049  | 0.016  | 1.051        | 0.072               | 0.788   |
| Urea                          | 69.760   | 29.362 | 60.062 | 12.570 | 0.861        | -0.216              | 0.566   |
| UTP                           | 1.668    | 0.572  | 0.668  | 0.317  | 0.400        | -1.321              | 0.022   |
| Valine                        | 2.573    | 0.571  | 1.369  | 0.976  | 0.532        | -0.910              | 0.077   |
| XMP                           | 0.015    | 0.004  | 0.014  | 0.003  | 0.888        | -0.172              | 0.519   |
| XTP                           | 0.066    | 0.017  | 0.042  | 0.019  | 0.635        | -0.655              | 0.107   |
